# Supplementary material for: Editing of the urease gene by CRISPR-Cas in the diatom Thalassiosira pseudonana
Source: PubMed Central journal article supplement (PMC5121945; doi:10.1186/s13007-016-0148-0), 2016-11-24
Supplement: 13007_2016_148_MOESM1_ESM.pdf [file 13007_2016_148_MOESM1_ESM.pdf]

| Target sequence      | bp No | Cas9 cut | GC   | 5' Nt | PAM | Location | Strand | Sense sequence       | sgRNA score | Restriction sites  |
|----------------------|-------|----------|------|-------|-----|----------|--------|----------------------|-------------|--------------------|
| GCCTCGAGTAGAAGTCACCG | 41    | 44       | 0.4  | G     | TGG | Intron1  | -      | CGGTGACTTCTACTCGAGGC | 0.890       | HphI               |
| GCTCATTGCAAGGATTCAAG | 915   | 932      | 0.45 | G     | CGG | Exon3    | +      | GCTCATTGCAAGGATTCAAG | 0.839       |                    |
| GTCGTAATCAAGTATTGCCG | 158   | 175      | 0.4  | G     | GGG | Exon2    | +      | GTCGTAATCAAGTATTGCCG | 0.791       | HpaII              |
| GTTGGGGTGAGATTGAAAAG | 755   | 772      | 0.4  | G     | AGG | Exon3    | +      | GTTGGGGTGAGATTGAAAAG | 0.790       |                    |
| GACTATTCATGCTTACCACA | 1659  | 1676     | 0.55 | G     | CGG | Exon3    | +      | GACTATTCATGCTTACCACA | 0.773       |                    |
| GCATCATTTCCACATGACCA | 1380  | 1383     | 0.3  | G     | GGG | Exon3    | -      | TGGTCATGTGGAAATGATGC | 0.692       |                    |
| GTGACTTTGGTGAATCTTGG | 676   | 693      | 0.35 | G     | CGG | Exon3    | +      | GTGACTTTGGTGAATCTTGG | 0.683       |                    |
| GTAGCCGATGGAGATCGTTG | 739   | 756      | 0.6  | G     | GGG | Exon3    | +      | GTAGCCGATGGAGATCGTTG | 0.653       |                    |
| GATTTAAGTGTGTTTCGTGG | 319   | 336      | 0.45 | G     | TGG | Exon2    | +      | GATTTAAGTGTGTTTCGTGG | 0.648       |                    |
| GGATGGGACCAAGTTGTTGA | 225   | 242      | 0.45 | G     | CGG | Exon2    | +      | GGATGGGACCAAGTTGTTGA | 0.600       |                    |
| GAGAGGTCATCACTCGTACG | 2048  | 2065     | 0.35 | G     | TGG | Exon4    | +      | GAGAGGTCATCACTCGTACG | 0.563       | Maell Csp6I SpII   |
| GGAGTCACTACAATGTTTGG | 1306  | 1323     | 0.4  | G     | AGG | Exon3    | +      | GGAGTCACTACAATGTTTGG | 0.534       |                    |
| GGTGCATGATCCTATCGGGA | 246   | 263      | 0.65 | G     | GGG | Exon2    | +      | GGTGCATGATCCTATCGGGA | 0.533       |                    |
| GGTAATCCGGATACAATGAA | 1138  | 1155     | 0.5  | G     | TGG | Exon3    | +      | GGTAATCCGGATACAATGAA | 0.502       | TspDI              |
| GTTTCCGATCTAATGTCCAT | 121   | 138      | 0.55 | G     | CGG | Exon2    | +      | GTTTCCGATCTAATGTCCAT | 0.500       | BclI               |
| GAATGGATGGATCAAGGTGG | 1905  | 1908     | 0.55 | G     | TGG | Exon4    | -      | CCACCTTGATCCATCCATTC | 0.485       |                    |
| GATTGTACCAGGTCAAGTGA | 411   | 428      | 0.4  | G     | TGG | Intron2  | +      | GATTGTACCAGGTCAAGTGA | 0.481       |                    |
| GGAGATAGACCTATTCAAGT | 529   | 546      | 0.5  | G     | TGG | Exon3    | +      | GGAGATAGACCTATTCAAGT | 0.479       |                    |
| GCAACTACTGATGTAATTGC | 1198  | 1215     | 0.5  | G     | GGG | Exon3    | +      | GCAACTACTGATGTAATTGC | 0.478       | MluCI              |
| GATGGTATCGGAGAACGATT | 2467  | 2484     | 0.45 | G     | GGG | Exon4    | +      | GATGGTATCGGAGAACGATT | 0.477       |                    |
| GCGATAGCGTGGGCTCAGAT | 2317  | 2334     | 0.5  | G     | GGG | Exon4    | +      | GCGATAGCGTGGGCTCAGAT | 0.476       | BclI BseMII        |
| GTGGAGGCGACATTTCCGGA | 208   | 225      | 0.4  | G     | TGG | Exon2    | +      | GTGGAGGCGACATTTCCGGA | 0.465       | BseGI HpaII BspMII |

Figure S1
